# Supplementary material for: The Influence of Adipocyte Secretome on Selected Metabolic Fingerprints of Breast Cancer Cell Lines Representing the Four Major Breast Cancer Subtypes
Source: MDPI journal article supplement (doi:10.3390/cells12172123), 2023-08-22
Supplement: s1 [file s1]

**Table S1 – Nutrient composition of cell medium of control (DMEM) and treatment (secretome).**

| Metabolite            | Control (DMEM) | Treatment (secretome) |
|-----------------------|----------------|-----------------------|
| Glucose (mM)          | 20             | 15                    |
| Pyruvate (mM)         | 0.3            | 0.03                  |
| Lactate (mM)          | 0              | 1.2                   |
| Acetate (mM)          | 0.09           | 0.2                   |
| Alanine (mM)          | 0              | 0.6                   |
| Glutamine (mM)        | 6              | 1.6                   |
| Glutamate (mM)        | 0              | 0                     |
| Isoleucine (mM)       | 0.7            | 0.4                   |
| Valine (mM)           | 0.7            | 0.4                   |
| Triglycerides (mg/dL) | 1              | 53                    |
| Cholesterol (mg/dL)   | 21             | 24                    |

**Table S2 – Expression of beta actin on mRNA level from the performed RT-PCR.**

|            | CT<br>PCR1 | CT<br>PCR2 | CT<br>PCR3 | Final CT | 2 <sup>^</sup> (-CT) |
|------------|------------|------------|------------|----------|----------------------|
| MCF7 C1    | 18,3377    | 18,77367   | 18,41137   | 18,50758 | 2,68327E-06          |
| MCF7 C2    | 18,3295    | 19,17043   | 18,61358   | 18,7045  | 2,34091E-06          |
| MCF7 C3    | 18,38988   | 19,68531   | 18,46581   | 18,847   | 2,12074E-06          |
| MCF7 C4    | 18,58482   | 19,69935   | 18,74795   | 19,0107  | 1,89325E-06          |
| MCF7 C5    | 18,85521   | 19,73949   | 19,01118   | 19,20196 | 1,65819E-06          |
| MDA 231 C1 | 18,43274   | 19,1138    | 18,64384   | 18,73013 | 2,29969E-06          |
| MDA 231 C2 | 18,41857   | 18,8613    | 18,42292   | 18,56759 | 2,57393E-06          |
| MDA 231 C3 | 18,5863    | 19,12144   | 18,63262   | 18,78012 | 2,22136E-06          |
| MDA 231 C4 | 17,51715   | 18,99463   | 18,2226    | 18,2448  | 3,21936E-06          |
| MDA 231 C5 | 18,24021   | 19,19319   | 18,39148   | 18,60829 | 2,50234E-06          |
| BT474 C2   | 13,68      | 13,235     | 13,205     | 13,37333 | 9,42379E-05          |
| BT474 C3   | 13,58      | 13,31      | 13,25      | 13,38    | 9,38034E-05          |
| BT474 C4   | 14,14      | 13,77      | 13,65      | 13,85333 | 6,75665E-05          |
| BT474 C5   | 13,56      | 13,33      | 13,37      | 13,42    | 9,12384E-05          |
| SKBR3 C1   | 17,98981   | 18,4534    |            | 18,22161 | 3,27151E-06          |
| SKBR3 C2   | 15,33128   | 15,44609   | 15,89798   | 15,55845 | 2,07224E-05          |
| SKBR3 C3   | 18,10436   | 17,99487   | 17,98436   | 18,02786 | 3,74173E-06          |
| SKBR3 C4   | 16,38149   | 16,77188   | 16,65473   | 16,6027  | 1,00482E-05          |
| SKBR3 C5   | 15,78928   | 15,90693   | 15,97893   | 15,89171 | 1,64482E-05          |
| MCF7 T1    | 17,32354   | 19,47494   | 17,88758   | 18,22869 | 3,25551E-06          |
| MCF7 T2    | 18,04393   | 18,9345    | 18,11221   | 18,36355 | 2,96498E-06          |
| MCF7 T3    | 17,96866   | 19,3034    | 17,58455   | 18,28554 | 3,12972E-06          |
| MCFT T4    | 18,14206   | 19,25178   | 17,62466   | 18,3395  | 3,01481E-06          |
| MCFT T5    | 17,68686   | 19,05613   | 17,23485   | 17,99261 | 3,83428E-06          |
| MDA 231 T1 | 17,34028   | 19,38313   | 18,26016   | 18,32785 | 3,03925E-06          |
| MDA 231 T2 | 18,36129   | 18,75279   | 18,47408   | 18,52939 | 2,64301E-06          |
| MDA 231 T3 | 17,95972   | 18,79696   | 18,27936   | 18,34535 | 3,00262E-06          |
| MDA 231 T4 | 17,76845   | 18,79349   | 18,21941   | 18,26045 | 3,18462E-06          |
| MDA 231 T5 | 17,08262   | 18,42048   | 17,96621   | 17,82311 | 4,31231E-06          |
| BT474 T2   | 13,69      | 13,56      | 13,45      | 13,56667 | 8,24188E-05          |
| BT474 T3   | 14,2       | 14,005     | 13,86      | 14,02167 | 6,01254E-05          |
| BT474 T4   | 13,285     | 13,2       | 13,26      | 13,24833 | 0,000102767          |
| BT474 T5   | 14,39      | 14,085     | 13,99      | 14,155   | 5,48176E-05          |
| SKBR3 T1   | 17,25593   | 17,45463   | 17,36785   | 17,35947 | 5,94674E-06          |
| SKBR3 T2   | 16,27944   | 16,80253   | 16,74227   | 16,60808 | 1,00108E-05          |
| SKBR3 T3   | 17,21542   | 17,43576   | 17,28724   | 17,31281 | 6,14221E-06          |
| SKBR3 T4   | 17,68618   | 17,21191   | 17,1729    | 17,357   | 5,95694E-06          |
| SKBR3 T5   | 16,33717   | 16,3909    | 16,52253   | 16,41687 | 1,14296E-05          |

NOTE: Average of the assays was taken in account to calculate 2<sup>^</sup>(-CT).
